# Supplementary material for: Wolbachia and DNA Barcoding Insects: Patterns, Potential, and Problems
Source: PubMed Central journal article supplement (PMC3342236; doi:10.1371/journal.pone.0036514), 2012-05-02

**Figure S1.**

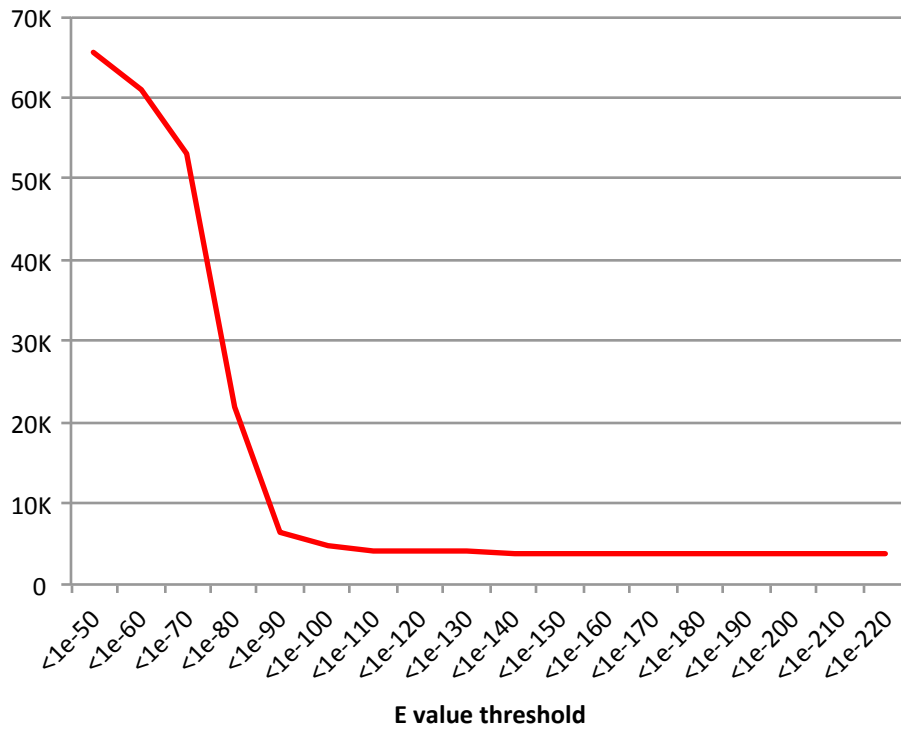

Supplement: pone.0036514.s001.pdf [file pone.0036514.s001.pdf]
